# Supplementary material for: TIPARP as a prognostic biomarker and potential immunotherapeutic target in male papillary thyroid carcinoma
Source: Cancer Cell Int. 2024 Jan 17;24:34. doi: 10.1186/s12935-024-03223-6 (PMC10795290; doi:10.1186/s12935-024-03223-6)
Supplement: Supplementary file 1 — Supplementary Table 1: Table of sex distribution. The sex distribution of each GEO dataset was identified [file 12935_2024_3223_MOESM1_ESM.xlsx]

## Sheet: Sheet1
Dataset	Platform	Male	Female	Tatal
GSE3467	GPL570	10	6	16
GSE6004	GPL571	3	11	14
GSE27155	GPL96	26	73	99
GSE29265	GPL570	18	22	40
GSE33630	GPL570	25	80	105
GSE35570	GPL570	32	84	116
GSE58545	GPL96	8	35	43
GSE60542	GPL570	37	54	91
		159	365
