# Supplementary material for: TIPARP as a prognostic biomarker and potential immunotherapeutic target in male papillary thyroid carcinoma
Source: Cancer Cell Int. 2024 Jan 17;24:34. doi: 10.1186/s12935-024-03223-6 (PMC10795290; doi:10.1186/s12935-024-03223-6)
Supplement: Supplementary file 2 — Additional File 1: The result of model GSEA analysis, which contains the accurate information of the NES, p-values and FDR [file 12935_2024_3223_MOESM2_ESM.xlsx]

## Sheet: gsea_report_for_high_1679068701
NAME	GS<br> follow link to MSigDB	GS DETAILS	SIZE	ES	NES	NOM p-val	FDR q-val	FWER p-val	RANK AT MAX	LEADING EDGE
KEGG_P53_SIGNALING_PATHWAY	KEGG_P53_SIGNALING_PATHWAY	Details ...	66	0.595526	1.90168	0	0.130913	0.059	16273	tags=65%, list=28%, signal=90%
KEGG_CYTOKINE_CYTOKINE_RECEPTOR_INTERACTION	KEGG_CYTOKINE_CYTOKINE_RECEPTOR_INTERACTION	Details ...	262	0.653861	1.81724	0.00749064	0.189332	0.119	9327	tags=56%, list=16%, signal=67%
KEGG_RIG_I_LIKE_RECEPTOR_SIGNALING_PATHWAY	KEGG_RIG_I_LIKE_RECEPTOR_SIGNALING_PATHWAY	Details ...	69	0.453463	1.81582	0.00740741	0.128908	0.121	16969	tags=45%, list=29%, signal=63%
KEGG_JAK_STAT_SIGNALING_PATHWAY	KEGG_JAK_STAT_SIGNALING_PATHWAY	Details ...	155	0.54311	1.81254	0.00767754	0.100651	0.124	11967	tags=46%, list=20%, signal=58%
KEGG_CHEMOKINE_SIGNALING_PATHWAY	KEGG_CHEMOKINE_SIGNALING_PATHWAY	Details ...	185	0.595933	1.79344	0.0284091	0.102684	0.144	7082	tags=35%, list=12%, signal=39%
KEGG_ARACHIDONIC_ACID_METABOLISM	KEGG_ARACHIDONIC_ACID_METABOLISM	Details ...	58	0.596829	1.77862	0	0.0969636	0.157	5929	tags=34%, list=10%, signal=38%
KEGG_NOD_LIKE_RECEPTOR_SIGNALING_PATHWAY	KEGG_NOD_LIKE_RECEPTOR_SIGNALING_PATHWAY	Details ...	61	0.648599	1.76814	0.0189036	0.0923438	0.167	8489	tags=43%, list=15%, signal=50%
KEGG_NATURAL_KILLER_CELL_MEDIATED_CYTOTOXICITY	KEGG_NATURAL_KILLER_CELL_MEDIATED_CYTOTOXICITY	Details ...	132	0.584201	1.76544	0.0233918	0.0825164	0.169	13415	tags=52%, list=23%, signal=68%
KEGG_GLYCOSPHINGOLIPID_BIOSYNTHESIS_LACTO_AND_NEOLACTO_SERIES	KEGG_GLYCOSPHINGOLIPID_BIOSYNTHESIS_LACTO_AND_NEOLACTO_SERIES	Details ...	26	0.596072	1.73928	0.0136719	0.0947613	0.206	6428	tags=31%, list=11%, signal=35%
KEGG_FC_EPSILON_RI_SIGNALING_PATHWAY	KEGG_FC_EPSILON_RI_SIGNALING_PATHWAY	Details ...	79	0.520155	1.73907	0.0245283	0.0853766	0.206	8656	tags=32%, list=15%, signal=37%
KEGG_CELL_ADHESION_MOLECULES_CAMS	KEGG_CELL_ADHESION_MOLECULES_CAMS	Details ...	128	0.628054	1.73547	0.0149813	0.0803609	0.211	9902	tags=57%, list=17%, signal=69%
KEGG_INTESTINAL_IMMUNE_NETWORK_FOR_IGA_PRODUCTION	KEGG_INTESTINAL_IMMUNE_NETWORK_FOR_IGA_PRODUCTION	Details ...	46	0.758705	1.72991	0.00571429	0.078216	0.221	10284	tags=76%, list=18%, signal=92%
KEGG_TOLL_LIKE_RECEPTOR_SIGNALING_PATHWAY	KEGG_TOLL_LIKE_RECEPTOR_SIGNALING_PATHWAY	Details ...	102	0.531256	1.70338	0.0335821	0.0939105	0.256	8833	tags=35%, list=15%, signal=42%
KEGG_APOPTOSIS	KEGG_APOPTOSIS	Details ...	87	0.503071	1.68885	0.0225564	0.099362	0.271	16610	tags=54%, list=28%, signal=75%
KEGG_SMALL_CELL_LUNG_CANCER	KEGG_SMALL_CELL_LUNG_CANCER	Details ...	84	0.489437	1.68047	0.0194175	0.101247	0.285	16066	tags=45%, list=28%, signal=62%
KEGG_ANTIGEN_PROCESSING_AND_PRESENTATION	KEGG_ANTIGEN_PROCESSING_AND_PRESENTATION	Details ...	81	0.557825	1.68042	0.0489642	0.0949187	0.285	16668	tags=59%, list=29%, signal=83%
KEGG_PHENYLALANINE_METABOLISM	KEGG_PHENYLALANINE_METABOLISM	Details ...	17	0.648841	1.67821	0.00967118	0.0914839	0.29	1218	tags=24%, list=2%, signal=24%
KEGG_CELL_CYCLE	KEGG_CELL_CYCLE	Details ...	124	0.51695	1.67438	0.00965251	0.0900752	0.298	23105	tags=72%, list=40%, signal=119%
KEGG_ASTHMA	KEGG_ASTHMA	Details ...	28	0.743425	1.66794	0.0206379	0.0899214	0.31	10284	tags=82%, list=18%, signal=100%
KEGG_AUTOIMMUNE_THYROID_DISEASE	KEGG_AUTOIMMUNE_THYROID_DISEASE	Details ...	50	0.619513	1.64852	0.04	0.10115	0.345	10284	tags=62%, list=18%, signal=75%
KEGG_HEMATOPOIETIC_CELL_LINEAGE	KEGG_HEMATOPOIETIC_CELL_LINEAGE		85	0.661368	1.6478	0.0460405	0.0971244	0.349	10214	tags=64%, list=17%, signal=77%
KEGG_TYPE_I_DIABETES_MELLITUS	KEGG_TYPE_I_DIABETES_MELLITUS		41	0.716991	1.6404	0.0244361	0.0994516	0.368	11041	tags=73%, list=19%, signal=90%
KEGG_O_GLYCAN_BIOSYNTHESIS	KEGG_O_GLYCAN_BIOSYNTHESIS		29	0.554082	1.63356	0.0268595	0.101026	0.377	11594	tags=38%, list=20%, signal=47%
KEGG_CHRONIC_MYELOID_LEUKEMIA	KEGG_CHRONIC_MYELOID_LEUKEMIA		73	0.478653	1.63138	0.0355731	0.0989472	0.381	26268	tags=78%, list=45%, signal=142%
KEGG_LEISHMANIA_INFECTION	KEGG_LEISHMANIA_INFECTION		70	0.646608	1.63075	0.0546139	0.0953573	0.381	15995	tags=70%, list=27%, signal=96%
KEGG_PYRIMIDINE_METABOLISM	KEGG_PYRIMIDINE_METABOLISM		97	0.465233	1.62701	0.0218688	0.0947595	0.384	25107	tags=68%, list=43%, signal=119%
KEGG_CYTOSOLIC_DNA_SENSING_PATHWAY	KEGG_CYTOSOLIC_DNA_SENSING_PATHWAY		53	0.476279	1.62275	0.0500928	0.0951488	0.392	8833	tags=30%, list=15%, signal=36%
KEGG_T_CELL_RECEPTOR_SIGNALING_PATHWAY	KEGG_T_CELL_RECEPTOR_SIGNALING_PATHWAY		107	0.556479	1.61876	0.0655106	0.0956259	0.396	8576	tags=33%, list=15%, signal=38%
KEGG_GLYCOSAMINOGLYCAN_BIOSYNTHESIS_HEPARAN_SULFATE	KEGG_GLYCOSAMINOGLYCAN_BIOSYNTHESIS_HEPARAN_SULFATE		26	0.566067	1.61524	0.0268199	0.0954132	0.402	16271	tags=54%, list=28%, signal=75%
KEGG_BLADDER_CANCER	KEGG_BLADDER_CANCER		41	0.491729	1.61089	0.0376238	0.0957788	0.405	20243	tags=63%, list=35%, signal=97%
KEGG_LEUKOCYTE_TRANSENDOTHELIAL_MIGRATION	KEGG_LEUKOCYTE_TRANSENDOTHELIAL_MIGRATION		115	0.482934	1.60629	0.0643275	0.0970941	0.416	14769	tags=44%, list=25%, signal=59%
KEGG_HOMOLOGOUS_RECOMBINATION	KEGG_HOMOLOGOUS_RECOMBINATION		26	0.594204	1.59943	0.00195695	0.099429	0.43	20587	tags=81%, list=35%, signal=125%
KEGG_PATHWAYS_IN_CANCER	KEGG_PATHWAYS_IN_CANCER		322	0.420728	1.59911	0.0568627	0.0965494	0.43	16500	tags=43%, list=28%, signal=60%
KEGG_EPITHELIAL_CELL_SIGNALING_IN_HELICOBACTER_PYLORI_INFECTION	KEGG_EPITHELIAL_CELL_SIGNALING_IN_HELICOBACTER_PYLORI_INFECTION		68	0.449875	1.59797	0.0406977	0.0947748	0.435	23082	tags=59%, list=40%, signal=97%
KEGG_ALLOGRAFT_REJECTION	KEGG_ALLOGRAFT_REJECTION		35	0.756634	1.58208	0.0340265	0.105506	0.458	11041	tags=86%, list=19%, signal=106%
KEGG_BASAL_TRANSCRIPTION_FACTORS	KEGG_BASAL_TRANSCRIPTION_FACTORS		35	0.512764	1.58036	0.0116505	0.104101	0.464	23224	tags=74%, list=40%, signal=123%
KEGG_GRAFT_VERSUS_HOST_DISEASE	KEGG_GRAFT_VERSUS_HOST_DISEASE		37	0.752956	1.5618	0.0458891	0.117792	0.503	12042	tags=86%, list=21%, signal=109%
KEGG_VIRAL_MYOCARDITIS	KEGG_VIRAL_MYOCARDITIS		68	0.552912	1.56165	0.0862745	0.114837	0.505	15355	tags=57%, list=26%, signal=78%
KEGG_SYSTEMIC_LUPUS_ERYTHEMATOSUS	KEGG_SYSTEMIC_LUPUS_ERYTHEMATOSUS		55	0.682641	1.5586	0.0627376	0.114058	0.507	11405	tags=73%, list=20%, signal=90%
KEGG_MAPK_SIGNALING_PATHWAY	KEGG_MAPK_SIGNALING_PATHWAY		266	0.387718	1.54397	0.0618956	0.123825	0.536	14510	tags=33%, list=25%, signal=43%
KEGG_DNA_REPLICATION	KEGG_DNA_REPLICATION		36	0.582677	1.54067	0.0116054	0.123645	0.541	20587	tags=83%, list=35%, signal=129%
KEGG_B_CELL_RECEPTOR_SIGNALING_PATHWAY	KEGG_B_CELL_RECEPTOR_SIGNALING_PATHWAY		75	0.501014	1.5367	0.0879541	0.123634	0.548	18136	tags=49%, list=31%, signal=71%
KEGG_VEGF_SIGNALING_PATHWAY	KEGG_VEGF_SIGNALING_PATHWAY		76	0.410535	1.53138	0.0681818	0.125335	0.56	4190	tags=16%, list=7%, signal=17%
KEGG_COMPLEMENT_AND_COAGULATION_CASCADES	KEGG_COMPLEMENT_AND_COAGULATION_CASCADES		69	0.537202	1.53029	0.0609524	0.123149	0.562	10214	tags=46%, list=17%, signal=56%
KEGG_ETHER_LIPID_METABOLISM	KEGG_ETHER_LIPID_METABOLISM		30	0.519531	1.52224	0.0486381	0.126802	0.576	12479	tags=47%, list=21%, signal=59%
KEGG_FC_GAMMA_R_MEDIATED_PHAGOCYTOSIS	KEGG_FC_GAMMA_R_MEDIATED_PHAGOCYTOSIS		93	0.466152	1.52214	0.0657895	0.124115	0.576	14436	tags=41%, list=25%, signal=54%
KEGG_GLYCOSAMINOGLYCAN_BIOSYNTHESIS_CHONDROITIN_SULFATE	KEGG_GLYCOSAMINOGLYCAN_BIOSYNTHESIS_CHONDROITIN_SULFATE		22	0.507469	1.51643	0.0411765	0.12642	0.583	8679	tags=32%, list=15%, signal=37%
KEGG_ENDOCYTOSIS	KEGG_ENDOCYTOSIS		179	0.399456	1.51323	0.101923	0.12646	0.589	22890	tags=53%, list=39%, signal=87%
KEGG_ECM_RECEPTOR_INTERACTION	KEGG_ECM_RECEPTOR_INTERACTION		84	0.529934	1.51182	0.0697211	0.125198	0.593	8213	tags=36%, list=14%, signal=42%
KEGG_SPLICEOSOME	KEGG_SPLICEOSOME		126	0.512357	1.50372	0.00391389	0.129523	0.607	25927	tags=88%, list=44%, signal=158%
KEGG_BIOSYNTHESIS_OF_UNSATURATED_FATTY_ACIDS	KEGG_BIOSYNTHESIS_OF_UNSATURATED_FATTY_ACIDS		20	0.49455	1.48967	0.0493359	0.140567	0.635	9842	tags=25%, list=17%, signal=30%
KEGG_LYSOSOME	KEGG_LYSOSOME		121	0.439362	1.48709	0.0943026	0.140079	0.639	25320	tags=59%, list=43%, signal=103%
KEGG_UBIQUITIN_MEDIATED_PROTEOLYSIS	KEGG_UBIQUITIN_MEDIATED_PROTEOLYSIS		130	0.445209	1.47508	0.032882	0.148887	0.658	28817	tags=82%, list=49%, signal=162%
KEGG_GLYCOSAMINOGLYCAN_BIOSYNTHESIS_KERATAN_SULFATE	KEGG_GLYCOSAMINOGLYCAN_BIOSYNTHESIS_KERATAN_SULFATE		15	0.559944	1.46722	0.0422535	0.15343	0.664	20398	tags=67%, list=35%, signal=102%
KEGG_AXON_GUIDANCE	KEGG_AXON_GUIDANCE		128	0.399279	1.46457	0.108911	0.15347	0.67	23194	tags=63%, list=40%, signal=105%
KEGG_NUCLEOTIDE_EXCISION_REPAIR	KEGG_NUCLEOTIDE_EXCISION_REPAIR		44	0.50857	1.46241	0.030888	0.152979	0.675	21030	tags=66%, list=36%, signal=103%
KEGG_NEUROTROPHIN_SIGNALING_PATHWAY	KEGG_NEUROTROPHIN_SIGNALING_PATHWAY		125	0.385993	1.45828	0.118217	0.154813	0.681	26271	tags=67%, list=45%, signal=122%
KEGG_PANCREATIC_CANCER	KEGG_PANCREATIC_CANCER		69	0.426217	1.45383	0.0939335	0.156565	0.684	20973	tags=58%, list=36%, signal=90%
KEGG_SPHINGOLIPID_METABOLISM	KEGG_SPHINGOLIPID_METABOLISM		36	0.42893	1.45366	0.0883459	0.153961	0.684	15690	tags=42%, list=27%, signal=57%
KEGG_PROGESTERONE_MEDIATED_OOCYTE_MATURATION	KEGG_PROGESTERONE_MEDIATED_OOCYTE_MATURATION		85	0.398921	1.45353	0.086629	0.151584	0.684	14436	tags=33%, list=25%, signal=44%
KEGG_BASE_EXCISION_REPAIR	KEGG_BASE_EXCISION_REPAIR		34	0.491059	1.4457	0.0383877	0.156425	0.692	25107	tags=74%, list=43%, signal=129%
KEGG_NOTCH_SIGNALING_PATHWAY	KEGG_NOTCH_SIGNALING_PATHWAY		47	0.407948	1.43793	0.0797665	0.161732	0.704	25098	tags=62%, list=43%, signal=108%
KEGG_MISMATCH_REPAIR	KEGG_MISMATCH_REPAIR		23	0.548743	1.43692	0.0374016	0.160028	0.705	20587	tags=70%, list=35%, signal=107%
KEGG_PRIMARY_IMMUNODEFICIENCY	KEGG_PRIMARY_IMMUNODEFICIENCY		35	0.681994	1.43214	0.128353	0.162139	0.708	8217	tags=63%, list=14%, signal=73%
KEGG_FOCAL_ADHESION	KEGG_FOCAL_ADHESION		197	0.396103	1.43109	0.152805	0.160987	0.709	15275	tags=36%, list=26%, signal=48%
KEGG_THYROID_CANCER	KEGG_THYROID_CANCER		29	0.451064	1.42667	0.0885312	0.162883	0.715	25913	tags=76%, list=44%, signal=136%
KEGG_LINOLEIC_ACID_METABOLISM	KEGG_LINOLEIC_ACID_METABOLISM		29	0.520427	1.42054	0.0615672	0.166406	0.722	8656	tags=41%, list=15%, signal=49%
KEGG_PATHOGENIC_ESCHERICHIA_COLI_INFECTION	KEGG_PATHOGENIC_ESCHERICHIA_COLI_INFECTION		56	0.418176	1.41927	0.10303	0.164748	0.722	24254	tags=79%, list=42%, signal=134%
KEGG_GLYOXYLATE_AND_DICARBOXYLATE_METABOLISM	KEGG_GLYOXYLATE_AND_DICARBOXYLATE_METABOLISM		16	0.491575	1.40617	0.0750469	0.174516	0.736	20733	tags=50%, list=36%, signal=78%
KEGG_PROTEASOME	KEGG_PROTEASOME		45	0.443531	1.40468	0.0994152	0.173417	0.736	25811	tags=80%, list=44%, signal=143%
KEGG_WNT_SIGNALING_PATHWAY	KEGG_WNT_SIGNALING_PATHWAY		150	0.367841	1.38907	0.124272	0.186544	0.753	23200	tags=57%, list=40%, signal=94%
KEGG_REGULATION_OF_ACTIN_CYTOSKELETON	KEGG_REGULATION_OF_ACTIN_CYTOSKELETON		212	0.351482	1.38837	0.155945	0.184487	0.753	7895	tags=20%, list=14%, signal=23%
KEGG_SNARE_INTERACTIONS_IN_VESICULAR_TRANSPORT	KEGG_SNARE_INTERACTIONS_IN_VESICULAR_TRANSPORT		38	0.439887	1.38833	0.111111	0.182005	0.753	28187	tags=74%, list=48%, signal=142%
KEGG_ALPHA_LINOLENIC_ACID_METABOLISM	KEGG_ALPHA_LINOLENIC_ACID_METABOLISM		19	0.557981	1.37945	0.117063	0.1885	0.762	8656	tags=42%, list=15%, signal=49%
KEGG_GLIOMA	KEGG_GLIOMA		65	0.393297	1.37679	0.183752	0.188458	0.763	18136	tags=43%, list=31%, signal=62%
KEGG_PURINE_METABOLISM	KEGG_PURINE_METABOLISM		153	0.33689	1.37425	0.131528	0.188758	0.765	16907	tags=35%, list=29%, signal=49%
KEGG_ALANINE_ASPARTATE_AND_GLUTAMATE_METABOLISM	KEGG_ALANINE_ASPARTATE_AND_GLUTAMATE_METABOLISM		30	0.416529	1.36174	0.1139	0.199484	0.775	16379	tags=43%, list=28%, signal=60%
KEGG_GLYCOSPHINGOLIPID_BIOSYNTHESIS_GANGLIO_SERIES	KEGG_GLYCOSPHINGOLIPID_BIOSYNTHESIS_GANGLIO_SERIES		15	0.478708	1.35534	0.124031	0.202821	0.782	13340	tags=27%, list=23%, signal=35%
KEGG_COLORECTAL_CANCER	KEGG_COLORECTAL_CANCER		62	0.388004	1.34227	0.193117	0.213516	0.786	17842	tags=42%, list=31%, signal=60%
KEGG_GNRH_SIGNALING_PATHWAY	KEGG_GNRH_SIGNALING_PATHWAY		101	0.343911	1.3337	0.157088	0.21973	0.789	10674	tags=24%, list=18%, signal=29%
KEGG_MELANOMA	KEGG_MELANOMA		71	0.391975	1.33082	0.151639	0.220253	0.792	14673	tags=39%, list=25%, signal=53%
KEGG_BASAL_CELL_CARCINOMA	KEGG_BASAL_CELL_CARCINOMA		55	0.445034	1.32654	0.168279	0.222308	0.795	9088	tags=27%, list=16%, signal=32%
KEGG_GLYCEROPHOSPHOLIPID_METABOLISM	KEGG_GLYCEROPHOSPHOLIPID_METABOLISM		71	0.345337	1.32494	0.156604	0.221357	0.795	8656	tags=20%, list=15%, signal=23%
KEGG_HISTIDINE_METABOLISM	KEGG_HISTIDINE_METABOLISM		28	0.460195	1.32431	0.157088	0.219387	0.795	3865	tags=21%, list=7%, signal=23%
KEGG_ACUTE_MYELOID_LEUKEMIA	KEGG_ACUTE_MYELOID_LEUKEMIA		57	0.392376	1.30443	0.23327	0.23895	0.811	19414	tags=49%, list=33%, signal=74%
KEGG_RENAL_CELL_CARCINOMA	KEGG_RENAL_CELL_CARCINOMA		66	0.374594	1.29435	0.234615	0.247194	0.822	26190	tags=67%, list=45%, signal=121%
KEGG_TIGHT_JUNCTION	KEGG_TIGHT_JUNCTION		128	0.317625	1.29252	0.194831	0.246328	0.822	23165	tags=59%, list=40%, signal=98%
KEGG_NON_SMALL_CELL_LUNG_CANCER	KEGG_NON_SMALL_CELL_LUNG_CANCER		54	0.369081	1.28929	0.227533	0.24688	0.823	20245	tags=48%, list=35%, signal=74%
KEGG_AMINO_SUGAR_AND_NUCLEOTIDE_SUGAR_METABOLISM	KEGG_AMINO_SUGAR_AND_NUCLEOTIDE_SUGAR_METABOLISM		42	0.395242	1.27712	0.217228	0.256946	0.833	22971	tags=48%, list=39%, signal=78%
KEGG_NEUROACTIVE_LIGAND_RECEPTOR_INTERACTION	KEGG_NEUROACTIVE_LIGAND_RECEPTOR_INTERACTION		271	0.420986	1.25081	0.168279	0.283283	0.852	10327	tags=38%, list=18%, signal=46%
KEGG_HYPERTROPHIC_CARDIOMYOPATHY_HCM	KEGG_HYPERTROPHIC_CARDIOMYOPATHY_HCM		83	0.406753	1.24927	0.244048	0.281821	0.852	16192	tags=43%, list=28%, signal=60%
KEGG_GLYCOSAMINOGLYCAN_DEGRADATION	KEGG_GLYCOSAMINOGLYCAN_DEGRADATION		21	0.427596	1.23935	0.240777	0.290737	0.861	16475	tags=38%, list=28%, signal=53%
KEGG_TYROSINE_METABOLISM	KEGG_TYROSINE_METABOLISM		40	0.421822	1.23109	0.223282	0.297658	0.864	1218	tags=15%, list=2%, signal=15%
KEGG_PROSTATE_CANCER	KEGG_PROSTATE_CANCER		89	0.326972	1.2232	0.28125	0.304122	0.867	23800	tags=61%, list=41%, signal=102%
KEGG_RIBOSOME	KEGG_RIBOSOME		88	0.474684	1.22043	0.237425	0.303799	0.868	27916	tags=92%, list=48%, signal=176%
KEGG_GLYCOLYSIS_GLUCONEOGENESIS	KEGG_GLYCOLYSIS_GLUCONEOGENESIS		61	0.346984	1.21697	0.208494	0.304825	0.872	2727	tags=10%, list=5%, signal=10%
KEGG_OOCYTE_MEIOSIS	KEGG_OOCYTE_MEIOSIS		111	0.316896	1.21006	0.277457	0.310636	0.88	23055	tags=53%, list=39%, signal=88%
KEGG_ARRHYTHMOGENIC_RIGHT_VENTRICULAR_CARDIOMYOPATHY_ARVC	KEGG_ARRHYTHMOGENIC_RIGHT_VENTRICULAR_CARDIOMYOPATHY_ARVC		74	0.390413	1.20854	0.2818	0.309456	0.88	11747	tags=32%, list=20%, signal=41%
KEGG_TRYPTOPHAN_METABOLISM	KEGG_TRYPTOPHAN_METABOLISM		39	0.415649	1.20647	0.262357	0.308917	0.881	5867	tags=18%, list=10%, signal=20%
KEGG_CYSTEINE_AND_METHIONINE_METABOLISM	KEGG_CYSTEINE_AND_METHIONINE_METABOLISM		34	0.354679	1.20406	0.267925	0.308463	0.883	19218	tags=35%, list=33%, signal=53%
KEGG_PARKINSONS_DISEASE	KEGG_PARKINSONS_DISEASE		113	0.302968	1.20219	0.282197	0.307097	0.883	5126	tags=6%, list=9%, signal=7%
KEGG_DILATED_CARDIOMYOPATHY	KEGG_DILATED_CARDIOMYOPATHY		90	0.382224	1.1953	0.269685	0.311943	0.886	16192	tags=42%, list=28%, signal=58%
KEGG_ADHERENS_JUNCTION	KEGG_ADHERENS_JUNCTION		68	0.345386	1.19223	0.318359	0.312629	0.886	23200	tags=68%, list=40%, signal=112%
KEGG_LONG_TERM_DEPRESSION	KEGG_LONG_TERM_DEPRESSION		68	0.342857	1.18164	0.25	0.321661	0.89	10541	tags=28%, list=18%, signal=34%
KEGG_RENIN_ANGIOTENSIN_SYSTEM	KEGG_RENIN_ANGIOTENSIN_SYSTEM		17	0.511748	1.17655	0.305118	0.324431	0.893	6799	tags=35%, list=12%, signal=40%
KEGG_MTOR_SIGNALING_PATHWAY	KEGG_MTOR_SIGNALING_PATHWAY		51	0.32844	1.17334	0.312741	0.325642	0.896	24660	tags=57%, list=42%, signal=98%
KEGG_ALDOSTERONE_REGULATED_SODIUM_REABSORPTION	KEGG_ALDOSTERONE_REGULATED_SODIUM_REABSORPTION		42	0.381691	1.17266	0.291985	0.323426	0.896	11959	tags=36%, list=20%, signal=45%
KEGG_FRUCTOSE_AND_MANNOSE_METABOLISM	KEGG_FRUCTOSE_AND_MANNOSE_METABOLISM		32	0.353764	1.1688	0.309615	0.325827	0.898	9570	tags=19%, list=16%, signal=22%
KEGG_ERBB_SIGNALING_PATHWAY	KEGG_ERBB_SIGNALING_PATHWAY		86	0.313026	1.16564	0.322457	0.326099	0.901	24727	tags=59%, list=42%, signal=103%
KEGG_MELANOGENESIS	KEGG_MELANOGENESIS		101	0.329847	1.15444	0.31068	0.335854	0.911	14688	tags=32%, list=25%, signal=42%
KEGG_AMINOACYL_TRNA_BIOSYNTHESIS	KEGG_AMINOACYL_TRNA_BIOSYNTHESIS		22	0.465128	1.15391	0.237132	0.333292	0.911	30310	tags=86%, list=52%, signal=180%
KEGG_RNA_POLYMERASE	KEGG_RNA_POLYMERASE		28	0.401866	1.14759	0.306748	0.337234	0.914	29598	tags=75%, list=51%, signal=152%
KEGG_HEDGEHOG_SIGNALING_PATHWAY	KEGG_HEDGEHOG_SIGNALING_PATHWAY		56	0.389146	1.14545	0.301556	0.336686	0.916	9088	tags=25%, list=16%, signal=30%
KEGG_PEROXISOME	KEGG_PEROXISOME		78	0.306758	1.14049	0.366224	0.339196	0.918	11513	tags=17%, list=20%, signal=21%
KEGG_SELENOAMINO_ACID_METABOLISM	KEGG_SELENOAMINO_ACID_METABOLISM		24	0.377761	1.13731	0.328185	0.340377	0.922	21005	tags=42%, list=36%, signal=65%
KEGG_TGF_BETA_SIGNALING_PATHWAY	KEGG_TGF_BETA_SIGNALING_PATHWAY		85	0.339135	1.13328	0.385214	0.342262	0.925	13434	tags=32%, list=23%, signal=41%
KEGG_METABOLISM_OF_XENOBIOTICS_BY_CYTOCHROME_P450	KEGG_METABOLISM_OF_XENOBIOTICS_BY_CYTOCHROME_P450		69	0.35521	1.12021	0.287129	0.354146	0.936	6626	tags=16%, list=11%, signal=18%
KEGG_N_GLYCAN_BIOSYNTHESIS	KEGG_N_GLYCAN_BIOSYNTHESIS		46	0.36006	1.10339	0.393822	0.371193	0.945	24662	tags=50%, list=42%, signal=86%
KEGG_CALCIUM_SIGNALING_PATHWAY	KEGG_CALCIUM_SIGNALING_PATHWAY		177	0.339872	1.0802	0.391732	0.396013	0.954	10541	tags=31%, list=18%, signal=38%
KEGG_AMYOTROPHIC_LATERAL_SCLEROSIS_ALS	KEGG_AMYOTROPHIC_LATERAL_SCLEROSIS_ALS		53	0.304105	1.06855	0.387795	0.40535	0.955	13378	tags=32%, list=23%, signal=42%
KEGG_ONE_CARBON_POOL_BY_FOLATE	KEGG_ONE_CARBON_POOL_BY_FOLATE		17	0.366918	1.06192	0.387755	0.410226	0.955	15667	tags=41%, list=27%, signal=56%
KEGG_GLUTATHIONE_METABOLISM	KEGG_GLUTATHIONE_METABOLISM		49	0.276541	1.06151	0.393474	0.407307	0.955	21680	tags=41%, list=37%, signal=65%
KEGG_PRION_DISEASES	KEGG_PRION_DISEASES		35	0.362347	1.05598	0.415686	0.411051	0.955	14689	tags=40%, list=25%, signal=53%
KEGG_DRUG_METABOLISM_OTHER_ENZYMES	KEGG_DRUG_METABOLISM_OTHER_ENZYMES		51	0.31481	1.04299	0.395582	0.422921	0.957	12545	tags=25%, list=21%, signal=32%
KEGG_VIBRIO_CHOLERAE_INFECTION	KEGG_VIBRIO_CHOLERAE_INFECTION		53	0.26195	1.01093	0.470037	0.4596	0.966	23165	tags=43%, list=40%, signal=72%
KEGG_REGULATION_OF_AUTOPHAGY	KEGG_REGULATION_OF_AUTOPHAGY		34	0.275287	1.00315	0.442804	0.465086	0.967	9011	tags=18%, list=15%, signal=21%
KEGG_PPAR_SIGNALING_PATHWAY	KEGG_PPAR_SIGNALING_PATHWAY		69	0.295323	0.997685	0.467412	0.46822	0.969	7040	tags=19%, list=12%, signal=21%
KEGG_STEROID_BIOSYNTHESIS	KEGG_STEROID_BIOSYNTHESIS		17	0.336799	0.99173	0.473485	0.472445	0.973	3370	tags=12%, list=6%, signal=12%
KEGG_RETINOL_METABOLISM	KEGG_RETINOL_METABOLISM		64	0.314806	0.986211	0.466926	0.475321	0.976	7952	tags=19%, list=14%, signal=22%
KEGG_PHOSPHATIDYLINOSITOL_SIGNALING_SYSTEM	KEGG_PHOSPHATIDYLINOSITOL_SIGNALING_SYSTEM		76	0.269946	0.978574	0.519924	0.481813	0.977	16715	tags=34%, list=29%, signal=48%
KEGG_HUNTINGTONS_DISEASE	KEGG_HUNTINGTONS_DISEASE		167	0.23053	0.973899	0.525794	0.485144	0.981	27180	tags=48%, list=47%, signal=89%
KEGG_PANTOTHENATE_AND_COA_BIOSYNTHESIS	KEGG_PANTOTHENATE_AND_COA_BIOSYNTHESIS		16	0.375038	0.966261	0.510516	0.49088	0.982	4481	tags=19%, list=8%, signal=20%
KEGG_GLYCEROLIPID_METABOLISM	KEGG_GLYCEROLIPID_METABOLISM		43	0.276127	0.96049	0.514231	0.494257	0.983	7616	tags=21%, list=13%, signal=24%
KEGG_GLYCOSYLPHOSPHATIDYLINOSITOL_GPI_ANCHOR_BIOSYNTHESIS	KEGG_GLYCOSYLPHOSPHATIDYLINOSITOL_GPI_ANCHOR_BIOSYNTHESIS		25	0.34993	0.951382	0.568047	0.501727	0.983	28317	tags=56%, list=48%, signal=109%
KEGG_NICOTINATE_AND_NICOTINAMIDE_METABOLISM	KEGG_NICOTINATE_AND_NICOTINAMIDE_METABOLISM		24	0.315007	0.93394	0.552124	0.521836	0.993	5356	tags=21%, list=9%, signal=23%
KEGG_RNA_DEGRADATION	KEGG_RNA_DEGRADATION		56	0.292393	0.927019	0.583804	0.526763	0.993	24876	tags=73%, list=43%, signal=127%
KEGG_GAP_JUNCTION	KEGG_GAP_JUNCTION		88	0.266155	0.926252	0.542914	0.524027	0.993	14673	tags=32%, list=25%, signal=42%
KEGG_CARDIAC_MUSCLE_CONTRACTION	KEGG_CARDIAC_MUSCLE_CONTRACTION		78	0.266633	0.876937	0.603272	0.588231	0.994	3376	tags=8%, list=6%, signal=8%
KEGG_PROTEIN_EXPORT	KEGG_PROTEIN_EXPORT		23	0.337264	0.869636	0.710173	0.594509	0.994	26003	tags=57%, list=45%, signal=102%
KEGG_STEROID_HORMONE_BIOSYNTHESIS	KEGG_STEROID_HORMONE_BIOSYNTHESIS		55	0.287792	0.865681	0.669922	0.596015	0.994	6626	tags=18%, list=11%, signal=20%
KEGG_VASCULAR_SMOOTH_MUSCLE_CONTRACTION	KEGG_VASCULAR_SMOOTH_MUSCLE_CONTRACTION		112	0.242056	0.858995	0.603738	0.601471	0.994	8849	tags=17%, list=15%, signal=20%
KEGG_GALACTOSE_METABOLISM	KEGG_GALACTOSE_METABOLISM		25	0.260164	0.835455	0.659774	0.631016	0.995	24909	tags=56%, list=43%, signal=98%
KEGG_ALZHEIMERS_DISEASE	KEGG_ALZHEIMERS_DISEASE		152	0.189462	0.814433	0.673664	0.658526	0.996	12628	tags=14%, list=22%, signal=18%
KEGG_ABC_TRANSPORTERS	KEGG_ABC_TRANSPORTERS		44	0.263048	0.801409	0.701689	0.67325	0.998	9854	tags=20%, list=17%, signal=25%
KEGG_DORSO_VENTRAL_AXIS_FORMATION	KEGG_DORSO_VENTRAL_AXIS_FORMATION		24	0.24822	0.790008	0.748031	0.684333	0.998	15040	tags=29%, list=26%, signal=39%
KEGG_LONG_TERM_POTENTIATION	KEGG_LONG_TERM_POTENTIATION		70	0.21575	0.789451	0.712891	0.680233	0.998	25992	tags=59%, list=45%, signal=105%
KEGG_ENDOMETRIAL_CANCER	KEGG_ENDOMETRIAL_CANCER		52	0.23575	0.788357	0.699422	0.677072	0.998	21105	tags=48%, list=36%, signal=75%
KEGG_VASOPRESSIN_REGULATED_WATER_REABSORPTION	KEGG_VASOPRESSIN_REGULATED_WATER_REABSORPTION		44	0.218962	0.779883	0.751029	0.684453	0.998	6595	tags=9%, list=11%, signal=10%
KEGG_VALINE_LEUCINE_AND_ISOLEUCINE_DEGRADATION	KEGG_VALINE_LEUCINE_AND_ISOLEUCINE_DEGRADATION		43	0.258359	0.77267	0.694757	0.689112	0.998	1366	tags=5%, list=2%, signal=5%
KEGG_OTHER_GLYCAN_DEGRADATION	KEGG_OTHER_GLYCAN_DEGRADATION		16	0.262116	0.746034	0.852207	0.721088	0.998	28971	tags=75%, list=50%, signal=149%
KEGG_TASTE_TRANSDUCTION	KEGG_TASTE_TRANSDUCTION		51	0.246945	0.731865	0.857715	0.735406	0.998	16173	tags=35%, list=28%, signal=49%
KEGG_PENTOSE_AND_GLUCURONATE_INTERCONVERSIONS	KEGG_PENTOSE_AND_GLUCURONATE_INTERCONVERSIONS		28	0.256416	0.729298	0.856263	0.734279	0.998	10051	tags=18%, list=17%, signal=22%
KEGG_PRIMARY_BILE_ACID_BIOSYNTHESIS	KEGG_PRIMARY_BILE_ACID_BIOSYNTHESIS		16	0.276498	0.728295	0.800391	0.730849	0.998	14412	tags=31%, list=25%, signal=41%
KEGG_INSULIN_SIGNALING_PATHWAY	KEGG_INSULIN_SIGNALING_PATHWAY		136	0.16874	0.718797	0.764486	0.738956	0.998	27639	tags=63%, list=47%, signal=118%
KEGG_DRUG_METABOLISM_CYTOCHROME_P450	KEGG_DRUG_METABOLISM_CYTOCHROME_P450		71	0.220372	0.695858	0.935547	0.765019	0.998	10051	tags=15%, list=17%, signal=19%
KEGG_PENTOSE_PHOSPHATE_PATHWAY	KEGG_PENTOSE_PHOSPHATE_PATHWAY		27	0.213338	0.673537	0.848907	0.789687	0.998	21932	tags=37%, list=38%, signal=59%
KEGG_PORPHYRIN_AND_CHLOROPHYLL_METABOLISM	KEGG_PORPHYRIN_AND_CHLOROPHYLL_METABOLISM		40	0.193592	0.634392	0.943548	0.83198	0.998	6626	tags=10%, list=11%, signal=11%
KEGG_OXIDATIVE_PHOSPHORYLATION	KEGG_OXIDATIVE_PHOSPHORYLATION		115	0.107942	0.407082	0.972763	0.986383	0.999	6473	tags=3%, list=11%, signal=4%
