# Supplementary material for: TIPARP as a prognostic biomarker and potential immunotherapeutic target in male papillary thyroid carcinoma
Source: Cancer Cell Int. 2024 Jan 17;24:34. doi: 10.1186/s12935-024-03223-6 (PMC10795290; doi:10.1186/s12935-024-03223-6)
Supplement: Supplementary file 3 — Additional File 2:: The result of TIPARP GSEA analysis, which contains the accurate information of the NES, p-values and FDR [file 12935_2024_3223_MOESM3_ESM.xlsx]

## Sheet: gsea_report_for_high_1687334364
NAME	GS<br> follow link to MSigDB	GS DETAILS	SIZE	ES	NES	NOM p-val	FDR q-val	FWER p-val	RANK AT MAX	LEADING EDGE
KEGG_ERBB_SIGNALING_PATHWAY	KEGG_ERBB_SIGNALING_PATHWAY	Details ...	86	0.537122	2.05092	0	0.0173679	0.009	20205	tags=67%, list=35%, signal=103%
KEGG_NEUROTROPHIN_SIGNALING_PATHWAY	KEGG_NEUROTROPHIN_SIGNALING_PATHWAY	Details ...	125	0.526981	2.04423	0	0.00983916	0.01	20222	tags=66%, list=35%, signal=101%
KEGG_CHRONIC_MYELOID_LEUKEMIA	KEGG_CHRONIC_MYELOID_LEUKEMIA	Details ...	73	0.590319	2.03734	0	0.00655944	0.01	20205	tags=78%, list=35%, signal=119%
KEGG_ENDOCYTOSIS	KEGG_ENDOCYTOSIS	Details ...	179	0.523764	1.99004	0	0.0126756	0.026	20205	tags=64%, list=35%, signal=97%
KEGG_FC_EPSILON_RI_SIGNALING_PATHWAY	KEGG_FC_EPSILON_RI_SIGNALING_PATHWAY	Details ...	79	0.595325	1.98266	0.0021322	0.0112908	0.028	6189	tags=34%, list=11%, signal=38%
KEGG_GLYCOSAMINOGLYCAN_BIOSYNTHESIS_CHONDROITIN_SULFATE	KEGG_GLYCOSAMINOGLYCAN_BIOSYNTHESIS_CHONDROITIN_SULFATE	Details ...	22	0.641157	1.95182	0	0.0136807	0.037	13541	tags=55%, list=23%, signal=71%
KEGG_APOPTOSIS	KEGG_APOPTOSIS	Details ...	87	0.568036	1.93186	0	0.0139482	0.042	16157	tags=57%, list=28%, signal=79%
KEGG_JAK_STAT_SIGNALING_PATHWAY	KEGG_JAK_STAT_SIGNALING_PATHWAY	Details ...	155	0.5714	1.91892	0.00414938	0.0159772	0.047	11546	tags=50%, list=20%, signal=63%
KEGG_EPITHELIAL_CELL_SIGNALING_IN_HELICOBACTER_PYLORI_INFECTION	KEGG_EPITHELIAL_CELL_SIGNALING_IN_HELICOBACTER_PYLORI_INFECTION	Details ...	68	0.520514	1.89924	0	0.0182196	0.06	20222	tags=62%, list=35%, signal=94%
KEGG_SMALL_CELL_LUNG_CANCER	KEGG_SMALL_CELL_LUNG_CANCER	Details ...	84	0.545129	1.89693	0	0.0169723	0.061	14745	tags=50%, list=25%, signal=67%
KEGG_RENAL_CELL_CARCINOMA	KEGG_RENAL_CELL_CARCINOMA	Details ...	66	0.545919	1.89666	0	0.0154293	0.061	20056	tags=71%, list=34%, signal=108%
KEGG_P53_SIGNALING_PATHWAY	KEGG_P53_SIGNALING_PATHWAY	Details ...	66	0.575276	1.89606	0.00211416	0.01424	0.061	18647	tags=68%, list=32%, signal=100%
KEGG_TOLL_LIKE_RECEPTOR_SIGNALING_PATHWAY	KEGG_TOLL_LIKE_RECEPTOR_SIGNALING_PATHWAY	Details ...	102	0.589569	1.86339	0.00630252	0.0205722	0.089	12806	tags=50%, list=22%, signal=64%
KEGG_PURINE_METABOLISM	KEGG_PURINE_METABOLISM	Details ...	153	0.43147	1.85582	0	0.0204589	0.094	18588	tags=46%, list=32%, signal=68%
KEGG_CYTOSOLIC_DNA_SENSING_PATHWAY	KEGG_CYTOSOLIC_DNA_SENSING_PATHWAY	Details ...	53	0.557413	1.85438	0.00617284	0.0194041	0.095	15643	tags=55%, list=27%, signal=75%
KEGG_GLYCOSAMINOGLYCAN_BIOSYNTHESIS_HEPARAN_SULFATE	KEGG_GLYCOSAMINOGLYCAN_BIOSYNTHESIS_HEPARAN_SULFATE	Details ...	26	0.647507	1.8512	0	0.0192334	0.099	9286	tags=50%, list=16%, signal=59%
KEGG_CELL_ADHESION_MOLECULES_CAMS	KEGG_CELL_ADHESION_MOLECULES_CAMS	Details ...	128	0.673022	1.84089	0.00428265	0.0199944	0.108	10397	tags=65%, list=18%, signal=79%
KEGG_PATHWAYS_IN_CANCER	KEGG_PATHWAYS_IN_CANCER	Details ...	322	0.466067	1.83419	0.00426439	0.020232	0.111	20205	tags=64%, list=35%, signal=97%
KEGG_MAPK_SIGNALING_PATHWAY	KEGG_MAPK_SIGNALING_PATHWAY	Details ...	266	0.442853	1.83331	0.00212314	0.0191672	0.111	20159	tags=59%, list=35%, signal=90%
KEGG_LEUKOCYTE_TRANSENDOTHELIAL_MIGRATION	KEGG_LEUKOCYTE_TRANSENDOTHELIAL_MIGRATION	Details ...	115	0.536902	1.83049	0.022869	0.0186602	0.114	16952	tags=57%, list=29%, signal=81%
KEGG_ARACHIDONIC_ACID_METABOLISM	KEGG_ARACHIDONIC_ACID_METABOLISM		58	0.597168	1.82561	0	0.0189313	0.121	5847	tags=34%, list=10%, signal=38%
KEGG_BIOSYNTHESIS_OF_UNSATURATED_FATTY_ACIDS	KEGG_BIOSYNTHESIS_OF_UNSATURATED_FATTY_ACIDS		20	0.605584	1.82552	0.00209205	0.0180708	0.121	19268	tags=65%, list=33%, signal=97%
KEGG_CYTOKINE_CYTOKINE_RECEPTOR_INTERACTION	KEGG_CYTOKINE_CYTOKINE_RECEPTOR_INTERACTION		262	0.65693	1.82482	0.00843882	0.0173867	0.121	7271	tags=52%, list=12%, signal=59%
KEGG_NATURAL_KILLER_CELL_MEDIATED_CYTOTOXICITY	KEGG_NATURAL_KILLER_CELL_MEDIATED_CYTOTOXICITY		132	0.603863	1.8222	0.0147992	0.0169705	0.123	11660	tags=53%, list=20%, signal=66%
KEGG_RIG_I_LIKE_RECEPTOR_SIGNALING_PATHWAY	KEGG_RIG_I_LIKE_RECEPTOR_SIGNALING_PATHWAY		69	0.463109	1.80498	0	0.0205991	0.144	16157	tags=45%, list=28%, signal=62%
KEGG_PROGESTERONE_MEDIATED_OOCYTE_MATURATION	KEGG_PROGESTERONE_MEDIATED_OOCYTE_MATURATION		85	0.488021	1.80131	0.0043573	0.0202897	0.148	20655	tags=59%, list=35%, signal=91%
KEGG_VEGF_SIGNALING_PATHWAY	KEGG_VEGF_SIGNALING_PATHWAY		76	0.481037	1.79048	0.010846	0.0219787	0.157	11906	tags=34%, list=20%, signal=43%
KEGG_AXON_GUIDANCE	KEGG_AXON_GUIDANCE		128	0.4787	1.77957	0.00669643	0.023673	0.17	19539	tags=65%, list=33%, signal=97%
KEGG_PATHOGENIC_ESCHERICHIA_COLI_INFECTION	KEGG_PATHOGENIC_ESCHERICHIA_COLI_INFECTION		56	0.503828	1.77369	0.0124481	0.0240616	0.179	19056	tags=63%, list=33%, signal=93%
KEGG_BLADDER_CANCER	KEGG_BLADDER_CANCER		41	0.524921	1.7728	0.0101626	0.0235204	0.179	18529	tags=68%, list=32%, signal=100%
KEGG_CHEMOKINE_SIGNALING_PATHWAY	KEGG_CHEMOKINE_SIGNALING_PATHWAY		185	0.59096	1.76767	0.0274262	0.0238695	0.182	12672	tags=52%, list=22%, signal=66%
KEGG_PYRIMIDINE_METABOLISM	KEGG_PYRIMIDINE_METABOLISM		97	0.480006	1.76674	0.00426439	0.0236183	0.183	25147	tags=71%, list=43%, signal=125%
KEGG_LYSOSOME	KEGG_LYSOSOME		121	0.511172	1.76588	0.00626305	0.0230468	0.184	20779	tags=61%, list=36%, signal=95%
KEGG_ALPHA_LINOLENIC_ACID_METABOLISM	KEGG_ALPHA_LINOLENIC_ACID_METABOLISM		19	0.705878	1.7651	0	0.0224682	0.184	5847	tags=42%, list=10%, signal=47%
KEGG_GNRH_SIGNALING_PATHWAY	KEGG_GNRH_SIGNALING_PATHWAY		101	0.450663	1.75705	0.00214592	0.0233718	0.191	20056	tags=53%, list=34%, signal=81%
KEGG_HEMATOPOIETIC_CELL_LINEAGE	KEGG_HEMATOPOIETIC_CELL_LINEAGE		85	0.688028	1.74388	0.0220884	0.0259984	0.212	7763	tags=60%, list=13%, signal=69%
KEGG_FC_GAMMA_R_MEDIATED_PHAGOCYTOSIS	KEGG_FC_GAMMA_R_MEDIATED_PHAGOCYTOSIS		93	0.524184	1.74253	0.0149893	0.0255203	0.213	16290	tags=49%, list=28%, signal=68%
KEGG_T_CELL_RECEPTOR_SIGNALING_PATHWAY	KEGG_T_CELL_RECEPTOR_SIGNALING_PATHWAY		107	0.592928	1.72982	0.0388769	0.0283075	0.235	15014	tags=57%, list=26%, signal=77%
KEGG_GLYCEROPHOSPHOLIPID_METABOLISM	KEGG_GLYCEROPHOSPHOLIPID_METABOLISM		71	0.451625	1.72828	0.00414938	0.0280115	0.237	5847	tags=23%, list=10%, signal=25%
KEGG_LINOLEIC_ACID_METABOLISM	KEGG_LINOLEIC_ACID_METABOLISM		29	0.63676	1.72767	0.00212766	0.0275497	0.239	5847	tags=38%, list=10%, signal=42%
KEGG_FOCAL_ADHESION	KEGG_FOCAL_ADHESION		197	0.470322	1.72735	0.0172414	0.0269545	0.24	20056	tags=62%, list=34%, signal=94%
KEGG_NON_SMALL_CELL_LUNG_CANCER	KEGG_NON_SMALL_CELL_LUNG_CANCER		54	0.486562	1.72603	0.0107296	0.026627	0.241	20816	tags=63%, list=36%, signal=98%
KEGG_PHOSPHATIDYLINOSITOL_SIGNALING_SYSTEM	KEGG_PHOSPHATIDYLINOSITOL_SIGNALING_SYSTEM		76	0.469091	1.72441	0.0087146	0.0262344	0.243	13257	tags=45%, list=23%, signal=58%
KEGG_AUTOIMMUNE_THYROID_DISEASE	KEGG_AUTOIMMUNE_THYROID_DISEASE		50	0.647253	1.72226	0.0162272	0.0262652	0.247	10187	tags=60%, list=17%, signal=73%
KEGG_NOD_LIKE_RECEPTOR_SIGNALING_PATHWAY	KEGG_NOD_LIKE_RECEPTOR_SIGNALING_PATHWAY		61	0.637524	1.7162	0.0337553	0.0272436	0.255	14902	tags=66%, list=26%, signal=88%
KEGG_PROSTATE_CANCER	KEGG_PROSTATE_CANCER		89	0.446864	1.71481	0.012766	0.0269954	0.255	20203	tags=62%, list=35%, signal=94%
KEGG_GLIOMA	KEGG_GLIOMA		65	0.470659	1.71463	0.0172414	0.0264879	0.255	21031	tags=63%, list=36%, signal=98%
KEGG_THYROID_CANCER	KEGG_THYROID_CANCER		29	0.530539	1.7137	0.00422833	0.0261615	0.256	17058	tags=59%, list=29%, signal=83%
KEGG_O_GLYCAN_BIOSYNTHESIS	KEGG_O_GLYCAN_BIOSYNTHESIS		29	0.579016	1.71316	0.00423729	0.025878	0.258	12362	tags=55%, list=21%, signal=70%
KEGG_LEISHMANIA_INFECTION	KEGG_LEISHMANIA_INFECTION		70	0.683932	1.71294	0.0252632	0.0254809	0.258	11906	tags=66%, list=20%, signal=82%
KEGG_SNARE_INTERACTIONS_IN_VESICULAR_TRANSPORT	KEGG_SNARE_INTERACTIONS_IN_VESICULAR_TRANSPORT		38	0.524503	1.71112	0	0.0253398	0.262	23877	tags=74%, list=41%, signal=125%
KEGG_ECM_RECEPTOR_INTERACTION	KEGG_ECM_RECEPTOR_INTERACTION		84	0.577072	1.70936	0.025641	0.0252697	0.264	13281	tags=55%, list=23%, signal=71%
KEGG_UBIQUITIN_MEDIATED_PROTEOLYSIS	KEGG_UBIQUITIN_MEDIATED_PROTEOLYSIS		130	0.50915	1.7093	0	0.0247929	0.264	23966	tags=74%, list=41%, signal=125%
KEGG_REGULATION_OF_ACTIN_CYTOSKELETON	KEGG_REGULATION_OF_ACTIN_CYTOSKELETON		212	0.418816	1.70352	0.012605	0.0259347	0.277	20300	tags=61%, list=35%, signal=93%
KEGG_CELL_CYCLE	KEGG_CELL_CYCLE		124	0.526132	1.69868	0.00869565	0.0265786	0.287	19993	tags=68%, list=34%, signal=103%
KEGG_ACUTE_MYELOID_LEUKEMIA	KEGG_ACUTE_MYELOID_LEUKEMIA		57	0.501171	1.69439	0.0123967	0.0271954	0.293	20143	tags=65%, list=34%, signal=99%
KEGG_BASAL_TRANSCRIPTION_FACTORS	KEGG_BASAL_TRANSCRIPTION_FACTORS		35	0.545579	1.69131	0	0.0274117	0.3	24455	tags=86%, list=42%, signal=147%
KEGG_COMPLEMENT_AND_COAGULATION_CASCADES	KEGG_COMPLEMENT_AND_COAGULATION_CASCADES		69	0.574536	1.6872	0.0308642	0.0276461	0.302	8404	tags=45%, list=14%, signal=52%
KEGG_COLORECTAL_CANCER	KEGG_COLORECTAL_CANCER		62	0.481289	1.6852	0.00421053	0.0276538	0.305	19983	tags=61%, list=34%, signal=93%
KEGG_LONG_TERM_DEPRESSION	KEGG_LONG_TERM_DEPRESSION		68	0.473564	1.6838	0.00849257	0.0274797	0.305	9290	tags=32%, list=16%, signal=38%
KEGG_STEROID_BIOSYNTHESIS	KEGG_STEROID_BIOSYNTHESIS		17	0.564087	1.68068	0.010846	0.0281479	0.311	13349	tags=53%, list=23%, signal=69%
KEGG_RENIN_ANGIOTENSIN_SYSTEM	KEGG_RENIN_ANGIOTENSIN_SYSTEM		17	0.718753	1.67974	0.0121212	0.0278473	0.311	10988	tags=59%, list=19%, signal=72%
KEGG_OOCYTE_MEIOSIS	KEGG_OOCYTE_MEIOSIS		111	0.427084	1.67813	0.0130719	0.0277678	0.315	18923	tags=50%, list=32%, signal=73%
KEGG_NEUROACTIVE_LIGAND_RECEPTOR_INTERACTION	KEGG_NEUROACTIVE_LIGAND_RECEPTOR_INTERACTION		271	0.55333	1.66614	0.0043384	0.0307271	0.332	9292	tags=44%, list=16%, signal=52%
KEGG_WNT_SIGNALING_PATHWAY	KEGG_WNT_SIGNALING_PATHWAY		150	0.424238	1.65953	0.0276008	0.0323608	0.347	20362	tags=58%, list=35%, signal=89%
KEGG_ANTIGEN_PROCESSING_AND_PRESENTATION	KEGG_ANTIGEN_PROCESSING_AND_PRESENTATION		81	0.559659	1.65604	0.0489237	0.0333587	0.356	14406	tags=49%, list=25%, signal=65%
KEGG_TIGHT_JUNCTION	KEGG_TIGHT_JUNCTION		128	0.401379	1.65416	0.0147679	0.0336439	0.361	19573	tags=52%, list=34%, signal=79%
KEGG_B_CELL_RECEPTOR_SIGNALING_PATHWAY	KEGG_B_CELL_RECEPTOR_SIGNALING_PATHWAY		75	0.5367	1.65202	0.0364807	0.0335385	0.362	20170	tags=65%, list=35%, signal=100%
KEGG_ARRHYTHMOGENIC_RIGHT_VENTRICULAR_CARDIOMYOPATHY_ARVC	KEGG_ARRHYTHMOGENIC_RIGHT_VENTRICULAR_CARDIOMYOPATHY_ARVC		74	0.509144	1.64856	0.039916	0.0341542	0.367	14058	tags=53%, list=24%, signal=69%
KEGG_ASTHMA	KEGG_ASTHMA		28	0.744645	1.64224	0.0270833	0.0355661	0.38	8266	tags=71%, list=14%, signal=83%
KEGG_MELANOGENESIS	KEGG_MELANOGENESIS		101	0.445452	1.64215	0.0245399	0.0350807	0.38	9290	tags=32%, list=16%, signal=38%
KEGG_PANCREATIC_CANCER	KEGG_PANCREATIC_CANCER		69	0.478239	1.6399	0.025641	0.0354748	0.384	16255	tags=55%, list=28%, signal=76%
KEGG_INTESTINAL_IMMUNE_NETWORK_FOR_IGA_PRODUCTION	KEGG_INTESTINAL_IMMUNE_NETWORK_FOR_IGA_PRODUCTION		46	0.715884	1.63283	0.0363248	0.0368302	0.393	11045	tags=76%, list=19%, signal=94%
KEGG_ADHERENS_JUNCTION	KEGG_ADHERENS_JUNCTION		68	0.461694	1.62938	0.0192308	0.0374693	0.399	19605	tags=68%, list=34%, signal=102%
KEGG_LONG_TERM_POTENTIATION	KEGG_LONG_TERM_POTENTIATION		70	0.420845	1.61878	0.0368852	0.0409046	0.421	19983	tags=53%, list=34%, signal=80%
KEGG_INOSITOL_PHOSPHATE_METABOLISM	KEGG_INOSITOL_PHOSPHATE_METABOLISM		54	0.430963	1.61734	0.018711	0.0408791	0.427	14805	tags=50%, list=25%, signal=67%
KEGG_GLYCOSAMINOGLYCAN_DEGRADATION	KEGG_GLYCOSAMINOGLYCAN_DEGRADATION		21	0.571856	1.61436	0.0334076	0.0413042	0.433	19525	tags=62%, list=33%, signal=93%
KEGG_VASCULAR_SMOOTH_MUSCLE_CONTRACTION	KEGG_VASCULAR_SMOOTH_MUSCLE_CONTRACTION		112	0.446755	1.61235	0.0294737	0.0416215	0.437	16035	tags=41%, list=27%, signal=57%
KEGG_AMINO_SUGAR_AND_NUCLEOTIDE_SUGAR_METABOLISM	KEGG_AMINO_SUGAR_AND_NUCLEOTIDE_SUGAR_METABOLISM		42	0.496138	1.60599	0.0333333	0.0434463	0.449	20187	tags=60%, list=35%, signal=91%
KEGG_ALDOSTERONE_REGULATED_SODIUM_REABSORPTION	KEGG_ALDOSTERONE_REGULATED_SODIUM_REABSORPTION		42	0.501359	1.58733	0.0508475	0.0491282	0.476	12275	tags=40%, list=21%, signal=51%
KEGG_SYSTEMIC_LUPUS_ERYTHEMATOSUS	KEGG_SYSTEMIC_LUPUS_ERYTHEMATOSUS		55	0.702044	1.586	0.0591966	0.04916	0.479	9654	tags=71%, list=17%, signal=85%
KEGG_ENDOMETRIAL_CANCER	KEGG_ENDOMETRIAL_CANCER		52	0.460637	1.58523	0.0254237	0.0489131	0.48	20056	tags=67%, list=34%, signal=102%
KEGG_VIRAL_MYOCARDITIS	KEGG_VIRAL_MYOCARDITIS		68	0.56532	1.58167	0.0680412	0.0495931	0.483	11484	tags=54%, list=20%, signal=68%
KEGG_ETHER_LIPID_METABOLISM	KEGG_ETHER_LIPID_METABOLISM		30	0.537257	1.5789	0.0442105	0.0500033	0.483	5847	tags=30%, list=10%, signal=33%
KEGG_ALLOGRAFT_REJECTION	KEGG_ALLOGRAFT_REJECTION		35	0.755212	1.57753	0.0289256	0.0499192	0.485	10187	tags=80%, list=17%, signal=97%
KEGG_PHENYLALANINE_METABOLISM	KEGG_PHENYLALANINE_METABOLISM		17	0.59477	1.572	0.0232068	0.051615	0.493	4018	tags=24%, list=7%, signal=25%
KEGG_TYPE_I_DIABETES_MELLITUS	KEGG_TYPE_I_DIABETES_MELLITUS		41	0.689079	1.55692	0.0709812	0.0576007	0.524	11500	tags=76%, list=20%, signal=94%
KEGG_VIBRIO_CHOLERAE_INFECTION	KEGG_VIBRIO_CHOLERAE_INFECTION		53	0.389905	1.53493	0.0291667	0.0662738	0.56	20816	tags=42%, list=36%, signal=64%
KEGG_DNA_REPLICATION	KEGG_DNA_REPLICATION		36	0.569366	1.52104	0.027897	0.0717162	0.58	20491	tags=83%, list=35%, signal=128%
KEGG_NOTCH_SIGNALING_PATHWAY	KEGG_NOTCH_SIGNALING_PATHWAY		47	0.429155	1.51928	0.0375783	0.0719213	0.582	20130	tags=60%, list=34%, signal=91%
KEGG_GLYCOSPHINGOLIPID_BIOSYNTHESIS_LACTO_AND_NEOLACTO_SERIES	KEGG_GLYCOSPHINGOLIPID_BIOSYNTHESIS_LACTO_AND_NEOLACTO_SERIES		26	0.516325	1.51655	0.0677966	0.0722261	0.588	7652	tags=27%, list=13%, signal=31%
KEGG_NUCLEOTIDE_EXCISION_REPAIR	KEGG_NUCLEOTIDE_EXCISION_REPAIR		44	0.520478	1.51616	0.0153173	0.0716608	0.588	23835	tags=77%, list=41%, signal=130%
KEGG_GLYCOSAMINOGLYCAN_BIOSYNTHESIS_KERATAN_SULFATE	KEGG_GLYCOSAMINOGLYCAN_BIOSYNTHESIS_KERATAN_SULFATE		15	0.55813	1.51318	0.0538302	0.0723296	0.594	20463	tags=67%, list=35%, signal=103%
KEGG_HOMOLOGOUS_RECOMBINATION	KEGG_HOMOLOGOUS_RECOMBINATION		26	0.549582	1.51093	0.0357895	0.0725963	0.597	19623	tags=69%, list=34%, signal=104%
KEGG_GRAFT_VERSUS_HOST_DISEASE	KEGG_GRAFT_VERSUS_HOST_DISEASE		37	0.735316	1.50242	0.0626263	0.0762596	0.612	10187	tags=76%, list=17%, signal=92%
KEGG_VASOPRESSIN_REGULATED_WATER_REABSORPTION	KEGG_VASOPRESSIN_REGULATED_WATER_REABSORPTION		44	0.408643	1.49673	0.0643154	0.0782613	0.621	25472	tags=68%, list=44%, signal=121%
KEGG_SELENOAMINO_ACID_METABOLISM	KEGG_SELENOAMINO_ACID_METABOLISM		24	0.486645	1.49357	0.0575693	0.0790366	0.626	19282	tags=63%, list=33%, signal=93%
KEGG_N_GLYCAN_BIOSYNTHESIS	KEGG_N_GLYCAN_BIOSYNTHESIS		46	0.488665	1.49236	0.0353982	0.0790576	0.627	21559	tags=59%, list=37%, signal=93%
KEGG_BASAL_CELL_CARCINOMA	KEGG_BASAL_CELL_CARCINOMA		55	0.48142	1.48705	0.0880503	0.0810706	0.634	11965	tags=45%, list=20%, signal=57%
KEGG_DILATED_CARDIOMYOPATHY	KEGG_DILATED_CARDIOMYOPATHY		90	0.456816	1.48656	0.0867769	0.0804641	0.634	15317	tags=48%, list=26%, signal=65%
KEGG_GAP_JUNCTION	KEGG_GAP_JUNCTION		88	0.414439	1.48165	0.0728051	0.08218	0.643	20056	tags=56%, list=34%, signal=85%
KEGG_SPLICEOSOME	KEGG_SPLICEOSOME		126	0.492658	1.46798	0.0129032	0.0883859	0.664	25967	tags=78%, list=44%, signal=140%
KEGG_AMYOTROPHIC_LATERAL_SCLEROSIS_ALS	KEGG_AMYOTROPHIC_LATERAL_SCLEROSIS_ALS		53	0.40333	1.4658	0.0708155	0.0885539	0.667	13880	tags=36%, list=24%, signal=47%
KEGG_PROTEASOME	KEGG_PROTEASOME		45	0.459012	1.46458	0.0743802	0.0884078	0.669	27878	tags=80%, list=48%, signal=153%
KEGG_CALCIUM_SIGNALING_PATHWAY	KEGG_CALCIUM_SIGNALING_PATHWAY		177	0.449209	1.46031	0.0862832	0.0898127	0.672	11750	tags=38%, list=20%, signal=48%
KEGG_MELANOMA	KEGG_MELANOMA		71	0.407461	1.45339	0.0785563	0.0924659	0.678	17770	tags=55%, list=30%, signal=79%
KEGG_MTOR_SIGNALING_PATHWAY	KEGG_MTOR_SIGNALING_PATHWAY		51	0.398158	1.44617	0.0679406	0.0948893	0.682	20008	tags=47%, list=34%, signal=72%
KEGG_MISMATCH_REPAIR	KEGG_MISMATCH_REPAIR		23	0.543922	1.44525	0.039666	0.0944038	0.684	19623	tags=74%, list=34%, signal=111%
KEGG_TGF_BETA_SIGNALING_PATHWAY	KEGG_TGF_BETA_SIGNALING_PATHWAY		85	0.413465	1.44509	0.122056	0.0936812	0.686	20008	tags=64%, list=34%, signal=97%
KEGG_PRION_DISEASES	KEGG_PRION_DISEASES		35	0.483072	1.43675	0.131183	0.0976463	0.703	11596	tags=46%, list=20%, signal=57%
KEGG_HISTIDINE_METABOLISM	KEGG_HISTIDINE_METABOLISM		28	0.48146	1.43255	0.102725	0.0994176	0.712	17154	tags=46%, list=29%, signal=66%
KEGG_PEROXISOME	KEGG_PEROXISOME		78	0.376228	1.42343	0.127083	0.10353	0.718	29653	tags=76%, list=51%, signal=153%
KEGG_GLYCEROLIPID_METABOLISM	KEGG_GLYCEROLIPID_METABOLISM		43	0.401435	1.42143	0.0856531	0.103635	0.719	5152	tags=19%, list=9%, signal=20%
KEGG_ALANINE_ASPARTATE_AND_GLUTAMATE_METABOLISM	KEGG_ALANINE_ASPARTATE_AND_GLUTAMATE_METABOLISM		30	0.415363	1.39744	0.0967742	0.117459	0.736	18796	tags=43%, list=32%, signal=64%
KEGG_HYPERTROPHIC_CARDIOMYOPATHY_HCM	KEGG_HYPERTROPHIC_CARDIOMYOPATHY_HCM		83	0.439509	1.38925	0.140756	0.122149	0.75	11234	tags=37%, list=19%, signal=46%
KEGG_RNA_POLYMERASE	KEGG_RNA_POLYMERASE		28	0.468563	1.38244	0.0864198	0.125625	0.756	28200	tags=79%, list=48%, signal=152%
KEGG_INSULIN_SIGNALING_PATHWAY	KEGG_INSULIN_SIGNALING_PATHWAY		136	0.310358	1.36362	0.162218	0.136863	0.77	20665	tags=48%, list=35%, signal=74%
KEGG_SPHINGOLIPID_METABOLISM	KEGG_SPHINGOLIPID_METABOLISM		36	0.396508	1.35844	0.133909	0.13945	0.771	19442	tags=58%, list=33%, signal=87%
KEGG_DORSO_VENTRAL_AXIS_FORMATION	KEGG_DORSO_VENTRAL_AXIS_FORMATION		24	0.417344	1.35805	0.103158	0.138567	0.771	16035	tags=54%, list=27%, signal=75%
KEGG_PRIMARY_IMMUNODEFICIENCY	KEGG_PRIMARY_IMMUNODEFICIENCY		35	0.647022	1.35765	0.188161	0.137795	0.771	6957	tags=54%, list=12%, signal=62%
KEGG_GALACTOSE_METABOLISM	KEGG_GALACTOSE_METABOLISM		25	0.412735	1.35511	0.138614	0.138684	0.774	20454	tags=48%, list=35%, signal=74%
KEGG_ABC_TRANSPORTERS	KEGG_ABC_TRANSPORTERS		44	0.424944	1.34702	0.150943	0.142733	0.783	20508	tags=59%, list=35%, signal=91%
KEGG_ALZHEIMERS_DISEASE	KEGG_ALZHEIMERS_DISEASE		152	0.307177	1.33297	0.132114	0.151027	0.792	14186	tags=24%, list=24%, signal=31%
KEGG_ADIPOCYTOKINE_SIGNALING_PATHWAY	KEGG_ADIPOCYTOKINE_SIGNALING_PATHWAY		66	0.348519	1.32953	0.173278	0.151931	0.794	12672	tags=29%, list=22%, signal=37%
KEGG_ONE_CARBON_POOL_BY_FOLATE	KEGG_ONE_CARBON_POOL_BY_FOLATE		17	0.446132	1.3171	0.140659	0.158943	0.799	15930	tags=65%, list=27%, signal=89%
KEGG_BASE_EXCISION_REPAIR	KEGG_BASE_EXCISION_REPAIR		34	0.440043	1.30194	0.112069	0.168588	0.806	24274	tags=71%, list=42%, signal=121%
KEGG_CYSTEINE_AND_METHIONINE_METABOLISM	KEGG_CYSTEINE_AND_METHIONINE_METABOLISM		34	0.372762	1.29853	0.147679	0.169808	0.809	18336	tags=47%, list=31%, signal=69%
KEGG_FRUCTOSE_AND_MANNOSE_METABOLISM	KEGG_FRUCTOSE_AND_MANNOSE_METABOLISM		32	0.365668	1.28649	0.223577	0.177632	0.815	15092	tags=31%, list=26%, signal=42%
KEGG_PANTOTHENATE_AND_COA_BIOSYNTHESIS	KEGG_PANTOTHENATE_AND_COA_BIOSYNTHESIS		16	0.487102	1.27933	0.192623	0.181774	0.819	6730	tags=31%, list=12%, signal=35%
KEGG_GLUTATHIONE_METABOLISM	KEGG_GLUTATHIONE_METABOLISM		49	0.329526	1.27555	0.193182	0.183753	0.823	20599	tags=43%, list=35%, signal=66%
KEGG_RNA_DEGRADATION	KEGG_RNA_DEGRADATION		56	0.393892	1.26503	0.182796	0.190727	0.829	26255	tags=80%, list=45%, signal=146%
KEGG_GLYCOSPHINGOLIPID_BIOSYNTHESIS_GANGLIO_SERIES	KEGG_GLYCOSPHINGOLIPID_BIOSYNTHESIS_GANGLIO_SERIES		15	0.43529	1.24369	0.203863	0.206087	0.844	19336	tags=53%, list=33%, signal=80%
KEGG_TRYPTOPHAN_METABOLISM	KEGG_TRYPTOPHAN_METABOLISM		39	0.406971	1.23982	0.217119	0.207319	0.845	10932	tags=28%, list=19%, signal=35%
KEGG_GLYOXYLATE_AND_DICARBOXYLATE_METABOLISM	KEGG_GLYOXYLATE_AND_DICARBOXYLATE_METABOLISM		16	0.422388	1.23857	0.227451	0.206774	0.846	26638	tags=75%, list=46%, signal=138%
KEGG_AMINOACYL_TRNA_BIOSYNTHESIS	KEGG_AMINOACYL_TRNA_BIOSYNTHESIS		22	0.497866	1.23574	0.138004	0.207379	0.847	26279	tags=82%, list=45%, signal=149%
KEGG_TYROSINE_METABOLISM	KEGG_TYROSINE_METABOLISM		40	0.402038	1.22234	0.226069	0.216855	0.853	5095	tags=20%, list=9%, signal=22%
KEGG_NITROGEN_METABOLISM	KEGG_NITROGEN_METABOLISM		23	0.411961	1.20422	0.23617	0.231776	0.867	12273	tags=43%, list=21%, signal=55%
KEGG_TYPE_II_DIABETES_MELLITUS	KEGG_TYPE_II_DIABETES_MELLITUS		47	0.358405	1.19232	0.276371	0.240164	0.872	6417	tags=23%, list=11%, signal=26%
KEGG_GLYCOLYSIS_GLUCONEOGENESIS	KEGG_GLYCOLYSIS_GLUCONEOGENESIS		61	0.321684	1.1729	0.279503	0.255202	0.884	5095	tags=13%, list=9%, signal=14%
KEGG_HEDGEHOG_SIGNALING_PATHWAY	KEGG_HEDGEHOG_SIGNALING_PATHWAY		56	0.381606	1.16365	0.289855	0.261625	0.888	10677	tags=36%, list=18%, signal=44%
KEGG_PPAR_SIGNALING_PATHWAY	KEGG_PPAR_SIGNALING_PATHWAY		69	0.330376	1.15148	0.298597	0.271419	0.897	11068	tags=26%, list=19%, signal=32%
KEGG_PENTOSE_PHOSPHATE_PATHWAY	KEGG_PENTOSE_PHOSPHATE_PATHWAY		27	0.352917	1.14241	0.309322	0.27756	0.902	16695	tags=41%, list=29%, signal=57%
KEGG_PROXIMAL_TUBULE_BICARBONATE_RECLAMATION	KEGG_PROXIMAL_TUBULE_BICARBONATE_RECLAMATION		23	0.396618	1.1361	0.300403	0.281689	0.903	7107	tags=26%, list=12%, signal=30%
KEGG_PROTEIN_EXPORT	KEGG_PROTEIN_EXPORT		23	0.429714	1.12399	0.29661	0.290601	0.909	30796	tags=91%, list=53%, signal=193%
KEGG_GLYCOSYLPHOSPHATIDYLINOSITOL_GPI_ANCHOR_BIOSYNTHESIS	KEGG_GLYCOSYLPHOSPHATIDYLINOSITOL_GPI_ANCHOR_BIOSYNTHESIS		25	0.405094	1.1165	0.339744	0.296214	0.914	26922	tags=76%, list=46%, signal=141%
KEGG_NICOTINATE_AND_NICOTINAMIDE_METABOLISM	KEGG_NICOTINATE_AND_NICOTINAMIDE_METABOLISM		24	0.361199	1.10579	0.369892	0.305046	0.92	5402	tags=21%, list=9%, signal=23%
KEGG_PARKINSONS_DISEASE	KEGG_PARKINSONS_DISEASE		113	0.270278	1.09777	0.390496	0.311681	0.926	7338	tags=7%, list=13%, signal=8%
KEGG_FATTY_ACID_METABOLISM	KEGG_FATTY_ACID_METABOLISM		42	0.310154	1.06664	0.402439	0.34204	0.94	29869	tags=69%, list=51%, signal=141%
KEGG_RETINOL_METABOLISM	KEGG_RETINOL_METABOLISM		64	0.336377	1.03805	0.399606	0.368874	0.948	16554	tags=34%, list=28%, signal=48%
KEGG_HUNTINGTONS_DISEASE	KEGG_HUNTINGTONS_DISEASE		167	0.231611	1.03292	0.467611	0.371677	0.948	24201	tags=37%, list=41%, signal=62%
KEGG_METABOLISM_OF_XENOBIOTICS_BY_CYTOCHROME_P450	KEGG_METABOLISM_OF_XENOBIOTICS_BY_CYTOCHROME_P450		69	0.328233	1.02844	0.399618	0.373679	0.951	5095	tags=13%, list=9%, signal=14%
KEGG_REGULATION_OF_AUTOPHAGY	KEGG_REGULATION_OF_AUTOPHAGY		34	0.289835	1.01215	0.434959	0.390207	0.958	18305	tags=35%, list=31%, signal=51%
KEGG_DRUG_METABOLISM_OTHER_ENZYMES	KEGG_DRUG_METABOLISM_OTHER_ENZYMES		51	0.310718	0.975618	0.497899	0.430205	0.972	21995	tags=49%, list=38%, signal=79%
KEGG_TASTE_TRANSDUCTION	KEGG_TASTE_TRANSDUCTION		51	0.331521	0.965797	0.524229	0.438724	0.976	17748	tags=39%, list=30%, signal=56%
KEGG_PRIMARY_BILE_ACID_BIOSYNTHESIS	KEGG_PRIMARY_BILE_ACID_BIOSYNTHESIS		16	0.321972	0.873618	0.626482	0.556589	0.989	13564	tags=31%, list=23%, signal=41%
KEGG_RIBOSOME	KEGG_RIBOSOME		88	0.309469	0.802787	0.688	0.652319	0.994	30609	tags=82%, list=52%, signal=172%
KEGG_STEROID_HORMONE_BIOSYNTHESIS	KEGG_STEROID_HORMONE_BIOSYNTHESIS		55	0.265309	0.798828	0.792636	0.654405	0.994	943	tags=7%, list=2%, signal=7%
KEGG_ARGININE_AND_PROLINE_METABOLISM	KEGG_ARGININE_AND_PROLINE_METABOLISM		53	0.21056	0.790724	0.719665	0.661717	0.994	17906	tags=32%, list=31%, signal=46%
KEGG_PROPANOATE_METABOLISM	KEGG_PROPANOATE_METABOLISM		32	0.26006	0.773019	0.71519	0.686076	0.995	28587	tags=56%, list=49%, signal=110%
KEGG_CARDIAC_MUSCLE_CONTRACTION	KEGG_CARDIAC_MUSCLE_CONTRACTION		78	0.233516	0.772718	0.745902	0.682155	0.995	7113	tags=13%, list=12%, signal=15%
KEGG_LYSINE_DEGRADATION	KEGG_LYSINE_DEGRADATION		39	0.250315	0.746114	0.757447	0.716757	0.997	28766	tags=69%, list=49%, signal=136%
KEGG_PYRUVATE_METABOLISM	KEGG_PYRUVATE_METABOLISM		40	0.196144	0.731283	0.795604	0.734247	0.997	3702	tags=8%, list=6%, signal=8%
KEGG_DRUG_METABOLISM_CYTOCHROME_P450	KEGG_DRUG_METABOLISM_CYTOCHROME_P450		71	0.230886	0.723677	0.903808	0.741159	0.997	5095	tags=11%, list=9%, signal=12%
KEGG_OTHER_GLYCAN_DEGRADATION	KEGG_OTHER_GLYCAN_DEGRADATION		16	0.241223	0.681172	0.915114	0.796978	0.998	28795	tags=88%, list=49%, signal=173%
KEGG_GLYCINE_SERINE_AND_THREONINE_METABOLISM	KEGG_GLYCINE_SERINE_AND_THREONINE_METABOLISM		31	0.219241	0.646088	0.879518	0.839014	0.999	19601	tags=42%, list=34%, signal=63%
KEGG_CITRATE_CYCLE_TCA_CYCLE	KEGG_CITRATE_CYCLE_TCA_CYCLE		31	0.220172	0.62902	0.881874	0.853886	0.999	26872	tags=58%, list=46%, signal=108%
KEGG_BETA_ALANINE_METABOLISM	KEGG_BETA_ALANINE_METABOLISM		22	0.186919	0.568415	0.939394	0.913053	1	28467	tags=55%, list=49%, signal=106%
KEGG_VALINE_LEUCINE_AND_ISOLEUCINE_DEGRADATION	KEGG_VALINE_LEUCINE_AND_ISOLEUCINE_DEGRADATION		43	0.177333	0.537574	0.93456	0.934748	1	2841	tags=5%, list=5%, signal=5%
KEGG_OXIDATIVE_PHOSPHORYLATION	KEGG_OXIDATIVE_PHOSPHORYLATION		115	0.0847085	0.326953	0.998039	0.998491	1	4624	tags=3%, list=8%, signal=3%
